# Supplementary material for: Method Designed to Respect Molecular Heterogeneity Can Profoundly Correct Present Data Interpretations for Genome-Wide Expression Analysis
Source: PubMed Central journal article supplement (PMC4368820; doi:10.1371/journal.pone.0121154), 2015-03-20
Supplement: pone.0121154.s023.pdf [file pone.0121154.s023.pdf]

| Accession no. | Reference                      | Contrast                                                                                                                          |
|---------------|--------------------------------|-----------------------------------------------------------------------------------------------------------------------------------|
| GSE14975      | Adam et al. 2010 [1]           | patient(5) vs. control(5)                                                                                                         |
| GSE12631      | Akinci et al. 2009 [2]         | sp(4) vs. nsop(4)                                                                                                                 |
| GSE32701      | Aoyagi et al. 2011 [3]         | surgical(20) vs. biopsy(20)                                                                                                       |
| GSE15090      | Arashiro et al. 2009 [4]       | affe(5) vs. asym(5)<br>affe(5) vs. ctrl(5)<br>asym(5) vs. ctrl(5)                                                                 |
| GSE14580      | Arijs et al. 2009 [5]          | UCNR_b(16) vs. CO(6)<br>UCR_b(8) vs. CO(6)<br>UCR_b(8) vs. UCNR_b(16)                                                             |
| GSE12251      | Arijs et al. 2009 [5]          | UCR(13) vs. UCNR(10)                                                                                                              |
| GSE12205      | Bae et al. 2009 [6]            | Cr(4) vs. No(4)<br>SOV_Cr(4) vs. No(4)                                                                                            |
| GSE23984      | Baeke et al. 2011 [7]          | TX527(5) vs. ctrl(5)                                                                                                              |
| GSE25550      | Baens et al. 2011 [8]          | pos(6) vs. neg(8)                                                                                                                 |
| GSE15192      | Bhat-Nakshatri et al. 2010 [9] | 44+24-(4) vs. 44-24+(4)                                                                                                           |
| GSE32178      | Brennan et al. 2011 [10]       | dystocia(4) vs. normal(4)                                                                                                         |
| GSE14858      | Bresolin et al. 2009 [11]      | like(20) vs. not_like(20)                                                                                                         |
| GSE22224      | Brouard et al. 2010 [12]       | CsA_m(14) vs. health(9)<br>SRL_m(23) vs. health(9)                                                                                |
| GSE13671      | Burga et al. 2009 [13]         | BRCA1_carrier(6) vs. ctrl(8)                                                                                                      |
| GSE6364       | Burney et al. 2007 [14]        | ESE_D(6) vs. ESE_N(3)<br>MSE_D(9) vs. MSE_N(8)<br>PE_D(6) vs. PE_N(5)                                                             |
| GSE12108      | Butchar et al. 2008 [15]       | novin(4) vs. uninfect(6)<br>sush(4) vs. uninfect(6)                                                                               |
| GSE7510       | Buzzeo et al. 2008 [16]        | GVHD(4) vs. ctrl(4)                                                                                                               |
| GSE5058       | Carolan et al. 2006 [17]       | non-smoker(12) vs. COPD(6)<br>non-smoker(12) vs. early_COPD(8)<br>non-smoker(12) vs. smoker(12)                                   |
| GSE10006      | Carolan et al. 2008 [18]       | la_sm(20) vs. la_non-sm(9)<br>sa_COPD(14) vs. sa_non-sm(13)<br>sa_early_COPD(13) vs. sa_non-sm(13)<br>sa_sm(18) vs. sa_non-sm(13) |
| GSE15271      | Caron et al. 2009 [19]         | centroblast_tonsil(4) vs. centrocyte_tonsil(4)                                                                                    |
| GSE30784      | Chen et al. 2008 [20]          | OSCC(167) vs. ctrl+dysplasia(62)<br>OSCC+dysplasia(184) vs. ctrl(45)                                                              |
| GSE24869      | Chen et al. 2011 [21]          | LTB4(5) vs. ctrl(5)                                                                                                               |
| GSE21369      | Cho et al. 2011 [22]           | ILD(23) vs. ctrl(6)                                                                                                               |
| GSE22035      | Cizkova et al. 2010 [23]       | mutated(14) vs. normal(29)                                                                                                        |
| GSE11618      | Connolly et al. 2009 [24]      | X_P4(4) vs. L_P4(4)<br>X_P8(4) vs. L_P8(4)                                                                                        |
| GSE14951      | Conti et al. 2007 [25]         | donor+transplanted(10) vs. normal(5)<br>transplanted-reperfused(5) vs. donor(5)                                                   |
| GSE7513       | Creighton et al. 2009 [26]     | 44p24n(14) vs. non-44p24n(15)                                                                                                     |
| GSE7515       |                                | primary(11) vs. cancer_m(15)                                                                                                      |
| GSE10334      | Demmer et al. 2008 [27]        | disease(183) vs. health(64)                                                                                                       |
| GSE12644      | Derbali et al. 2010 [28]       | case(10) vs. ctrl(10)                                                                                                             |
| GSE12452      | Dodd et al. 2006 [29]          | nvc(31) vs. normal(10)                                                                                                            |
| GSE10041      | Dusek et al. 2008 [30]         | M(25) vs. N1(23)<br>M(25) vs. N2(24)<br>N2(24) vs. N1(23)                                                                         |
| GSE22868      | Dutta et al. 2012 [31]         | high_PCB_exposure(9) vs. ctrl(5)                                                                                                  |
| GSE11839      | Erickson et al. 2008 [32]      | IC_DM(3) vs. HB_DM(3)<br>IC_KM(3) vs. HB_KM(3)                                                                                    |
| GSE7753       | Fall et al. 2007 [33]          | new_onset_sJIA(17) vs. ctrl(30)                                                                                                   |
| GSE12767      | Founds et al. 2009 [34]        | case(4) vs. ctrl(8)                                                                                                               |

| Accession no. | Reference                       | Contrast                                                                                                                                                       |
|---------------|---------------------------------|----------------------------------------------------------------------------------------------------------------------------------------------------------------|
| GSE11083      | Frank et al. 2009 [35]          | PBMC_JDM(13) vs. PBMC_ctrl(15)<br>PBMC_JIA(14) vs. PBMC_ctrl(15)<br>n_JDM(14) vs. ctrl(13)<br>n_JIA(14) vs. ctrl(13)                                           |
| GSE13205      | Fredriksson et al. 2008 [36]    | septic(13) vs. ctrl(8)                                                                                                                                         |
| GSE12198      | Fujisaki et al. 2009 [37]       | NKAES(5) vs. high_IL2(3)<br>NKAES(5) vs. low_IL2_1(3)<br>primary(5) vs. NKAES(5)                                                                               |
| GSE7023       | Furge et al. 2007 [38]          | p1.2a.k(5) vs. no_k(12)<br>p1_k(14) vs. no_k(12)<br>p2a.k(4) vs. no_k(12)<br>p2b_k(12) vs. no_k(12)                                                            |
| GSE10715      | Galamb et al. 2008 [39]         | AB+CD(19) vs. normal(11)                                                                                                                                       |
| GSE30153      | Garaud et al. 2011 [40]         | patient(17) vs. ctrl(9)                                                                                                                                        |
| GSE14970      | Ghorbel et al. 2010 [41]        | cyanotic(7) vs. acyanotic(5)                                                                                                                                   |
| GSE25014      | Ghosh et al. 2011 [42]          | PAECs_5mg(6) vs. PAECs_v(6)<br>PMVECs_5mg(6) vs. PMVECs_v(6)                                                                                                   |
| GSE10927      | Giordano et al. 2009 [43]       | car_ctrl(33) vs. ade(22)<br>car_ctrl(33) vs. normal(10)<br>car_ctrl1(16) vs. car_ctrl2(17)                                                                     |
| GSE7568       | Gratchev et al. 2008 [44]       | d.t_03h(5) vs. d_ctrl(5)<br>d.t_24h(5) vs. d_ctrl(5)<br>d.t_24h(5) vs. d.t_03h(5)<br>t_24h(5) vs. ctrl(5)                                                      |
| GSE6575       | Gregg et al. 2008 [45]          | ae(17) vs. GP(12)<br>ae+ar(35) vs. GP(12)<br>ar(18) vs. GP(12)<br>ar(18) vs. ae(17)                                                                            |
| GSE10063      | Gumus et al. 2008 [46]          | tob_03h(6) vs. ctrl_03h(6)<br>tob_06h(6) vs. ctrl_06h(6)<br>tob_12h(6) vs. ctrl_12h(6)<br>tob_24h(6) vs. ctrl_24h(6)<br>tob_30m(6) vs. ctrl_30m(6)             |
| GSE4183       | Gyorffy et al. 2010 [47]        | CRC(15) vs. normal(8)<br>IBD(15) vs. normal(8)<br>adenoma(15) vs. normal(8)                                                                                    |
| GSE25518      | Hadziselimovic et al. 2011 [48] | HAZLAZ(19) vs. ctrl(4)                                                                                                                                         |
| GSE13122      | Harewood et al. 2010 [49]       | lcl_bal(9) vs. lcl_ctrl(13)<br>lcl_unbal(4) vs. lcl_ctrl(13)                                                                                                   |
| GSE12679      | Harris et al. 2008 [50]         | endothelial(16) vs. neuron(16)                                                                                                                                 |
| GSE13274      | Hartman et al. 2010 [51]        | HMEC_ki(5) vs. HMEC_ctrl(5)<br>HMEC_ki(5) vs. HMEC_wt(5)<br>HMEC_wt(5) vs. HMEC_ctrl(5)                                                                        |
| GSE4498       | Harvey et al. 2007 [52]         | smoker(10) vs. non-smoker(12)                                                                                                                                  |
| GSE23994      | Herbert et al. 2010 [53]        | e_50(4) vs. e_IUSM(4)<br>e_50(4) vs. e_normal(4)<br>e_IUSM(4) vs. e_normal(4)<br>s_50(4) vs. s_IUSM(4)<br>s_50(4) vs. s_normal(4)<br>s_IUSM(4) vs. s_normal(4) |
| GSE7305       | Hever et al. 2007 [54]          | disease(10) vs. normal(10)                                                                                                                                     |
| GSE19650      | Hiraoka et al. 2011 [55]        | IPMA(6) vs. normal(7)<br>IPMC(6) vs. normal(7)<br>invasive(3) vs. normal(7)                                                                                    |
| GSE4107       | Hong et al. 2007 [56]           | patient(12) vs. ctrl(10)                                                                                                                                       |
| GSE9212       | Hsu et al. 2009 [57]            | NKX2(6) vs. ctrl(6)<br>PAX9(6) vs. ctrl(6)<br>TTF1(6) vs. ctrl(6)                                                                                              |
| GSE6885       | Ince et al. 2007 [58]           | BPLER(6) vs. BPE(5)<br>HMLER(6) vs. HME(4)                                                                                                                     |

| Accession no. | Reference                        | Contrast                                                                                                                                                                                                              |
|---------------|----------------------------------|-----------------------------------------------------------------------------------------------------------------------------------------------------------------------------------------------------------------------|
| GSE10586      | Jailwala et al. 2009 [59]        | T1D(12) vs. ctrl(15)                                                                                                                                                                                                  |
| GSE32473      | Jensen et al. 2012 [60]          | beta(10) vs. baseline(10)<br>pime(10) vs. baseline(10)                                                                                                                                                                |
| GSE10700      | Jorgensen et al. 2008 [61]       | 2R4F_02h(4) vs. m_02h(4)<br>2R4F_04h(4) vs. m_04h(4)<br>2R4F_08h(4) vs. m_08h(4)<br>2R4F_24h(4) vs. m_24h(4)<br>l_02h(4) vs. m_02h(4)<br>l_04h(4) vs. m_04h(4)<br>l_08h(4) vs. m_08h(4)<br>l_24h(4) vs. m_24h(4)      |
| GSE13067      | Jorissen et al. 2008 [62]        | MSS(63) vs. MSI(11)                                                                                                                                                                                                   |
| GSE13294      |                                  | MSS(77) vs. MSI(78)                                                                                                                                                                                                   |
| GSE4567       | Karoly et al. 2007 [63]          | UFP(4) vs. ctrl(4)                                                                                                                                                                                                    |
| GSE8823       | Kazeros et al. 2008 [64]         | sm(13) vs. non-sm(11)                                                                                                                                                                                                 |
| GSE21942      | Kemppinen et al. 2011 [65]       | patient(10) vs. ctrl(15)                                                                                                                                                                                              |
| GSE30355      | Kennedy-Crispin et al. 2012 [66] | KC(10) vs. NHEK(10)<br>LCM(10) vs. NHEK(10)                                                                                                                                                                           |
| GSE24468      | Kobayashi et al. 2010 [67]       | R5020(10) vs. vehicle(10)                                                                                                                                                                                             |
| GSE6519       | Kothapalli et al. 2007 [68]      | L(4) vs. ctrl(4)<br>L3(4) vs. ctrl(4)                                                                                                                                                                                 |
| GSE13670      | Kozziel et al. 2009 [69]         | hMDM_08h(5) vs. ctrl_08h(5)<br>hMDM_24h(5) vs. ctrl_24h(5)<br>hMDM_48h(5) vs. ctrl_48h(5)                                                                                                                             |
| GSE21422      | Kretschmer et al. 2011 [70]      | DCIS(9) vs. healthy(5)<br>IDC(5) vs. healthy(5)                                                                                                                                                                       |
| GSE10245      | Kuner et al. 2009 [71]           | NSCLC_SCC(18) vs. NSCLC_AC(40)                                                                                                                                                                                        |
| GSE14924      | Le et al. 2009 [72]              | AML_CD4(10) vs. health_CD4(10)<br>AML_CD8(10) vs. health_CD8(11)                                                                                                                                                      |
| GSE27390      | Lee et al. 2011 [73]             | RA(9) vs. OA(10)                                                                                                                                                                                                      |
| GSE7621       | Lesnick et al. 2007 [74]         | PD(16) vs. normal(9)                                                                                                                                                                                                  |
| GSE20891      | Leung et al. 2011 [75]           | sdf(4) vs. ctrl(4)                                                                                                                                                                                                    |
| GSE15372      | Li et al. 2009 [76]              | round5_A2780(5) vs. parental_A2780(5)                                                                                                                                                                                 |
| GSE5281       | Liang et al. 2007 [77]           | EC_affected(10) vs. EC_ctrl(13)<br>HIP_affected(10) vs. HIP_ctrl(13)<br>MTG_affected(16) vs. MTG_ctrl(12)<br>PC_affected(9) vs. PC_ctrl(13)<br>SFG_affected(23) vs. SFG_ctrl(11)<br>VCX_affected(19) vs. VCX_ctrl(12) |
| GSE10479      | Liu et al. 2008 [78]             | treated(4) vs. ctrl(4)                                                                                                                                                                                                |
| GSE18608      | Liu et al. 2010 [79]             | SG_A(10) vs. SG_H(4)<br>SG_B(10) vs. SG_H(4)                                                                                                                                                                          |
| GSE26272      | Liu et al. 2011 [80]             | ZNF145(4) vs. ctrl(4)                                                                                                                                                                                                 |
| GSE20910      | Loudin et al. 2011 [81]          | ALL_DS(23) vs. ALL_NDS(26)                                                                                                                                                                                            |
| GSE6962       | Magda et al. 2008 [82]           | PCI5002(4) vs. ctrl(4)<br>PCI5003(4) vs. ctrl(4)                                                                                                                                                                      |
| GSE12121      | Mans et al. 2009 [83]            | Pg(4) vs. sham(4)<br>Pg_Sg(4) vs. Pg(4)<br>Pg_Sg(4) vs. sham(4)<br>Sg(4) vs. sham(4)                                                                                                                                  |
| GSE11430      | Maouche et al. 2008 [84]         | mono(5) vs. macro(5)                                                                                                                                                                                                  |
| GSE30201      | McGowan et al. 2011 [85]         | patient(8) vs. normal(11)                                                                                                                                                                                             |
| GSE13987      | Meyers et al. 2009 [86]          | B_rolipram(4) vs. B_ctrl(4)<br>CLL_rolipram(4) vs. CLL_ctrl(4)<br>T_rolipram(4) vs. T_ctrl(4)                                                                                                                         |
| GSE7161       | Miao et al. 2007 [87]            | HCT116(4) vs. HCT116_ctrl(4)<br>MCF7(2) vs. MCF7_ctrl(2)                                                                                                                                                              |
| GSE26966      | Michaelis et al. 2011 [88]       | tumor(14) vs. normal(9)                                                                                                                                                                                               |

| Accession no. | Reference                      | Contrast                                                                                                                                                                                                                                                                                                                                                                                           |
|---------------|--------------------------------|----------------------------------------------------------------------------------------------------------------------------------------------------------------------------------------------------------------------------------------------------------------------------------------------------------------------------------------------------------------------------------------------------|
| GSE12949      | Mikkelsen et al. 2009 [89]     | 1h(4) vs 0h(4)<br>8h(4) vs 0h(4)<br>8h(4) vs 1h(4)                                                                                                                                                                                                                                                                                                                                                 |
| GSE23343      | Misu et al. 2010 [90]          | hyper(10) vs. normo(7)                                                                                                                                                                                                                                                                                                                                                                             |
| GSE6054       | Mosig et al. 2008 [91]         | heterozygot_FH(6) vs. ctrl(13)<br>homozygot_FH(4) vs. ctrl(13)                                                                                                                                                                                                                                                                                                                                     |
| GSE20211      | Mowery et al. 2010 [92]        | LMP_420(13) vs. ctrl(13)                                                                                                                                                                                                                                                                                                                                                                           |
| GSE11869      | Naciff et al. 2009 [93]        | high_08h(5) vs. ctrl_08h(5)<br>high_24h(5) vs. ctrl_24h(5)<br>high_48h(5) vs. ctrl_48h(5)<br>low_08h(5) vs. ctrl_08h(5)<br>low_24h(5) vs. ctrl_24h(5)<br>low_48h(5) vs. ctrl_48h(5)<br>veryhigh_08h(5) vs. ctrl_08h(5)<br>veryhigh_24h(5) vs. ctrl_24h(5)<br>veryhigh_48h(5) vs. ctrl_48h(5)<br>verylow_08h(5) vs. ctrl_08h(5)<br>verylow_24h(5) vs. ctrl_24h(5)<br>verylow_48h(5) vs. ctrl_48h(5) |
| GSE4182       | Nagy et al. 2006 [94]          | test(4) vs. ctrl(5)                                                                                                                                                                                                                                                                                                                                                                                |
| GSE26511      | Noordhuis et al. 2011 [95]     | positive(19) vs. negative(20)                                                                                                                                                                                                                                                                                                                                                                      |
| GSE9250       | Ouillette et al. 2008 [96]     | del13q(10) vs. FISHnormal(10)                                                                                                                                                                                                                                                                                                                                                                      |
| GSE32719      | Pang et al. 2012 [97]          | middle(5) vs. young(14)<br>old(8) vs. young(14)                                                                                                                                                                                                                                                                                                                                                    |
| GSE22459      | Park et al. 2010 [98]          | IFTA(24) vs. norm(25)<br>IFTA_i(16) vs. norm(25)                                                                                                                                                                                                                                                                                                                                                   |
| GSE6281       | Pedersen et al. 2007 [99]      | ctrl_07h(5) vs. ctrl_00h(3)<br>ctrl_48h(4) vs. ctrl_00h(3)<br>ctrl_96h(4) vs. ctrl_00h(3)<br>p_07h(5) vs. p_00h(4)<br>p_48h(3) vs. p_00h(4)<br>p_96h(6) vs. p_00h(4)                                                                                                                                                                                                                               |
| GSE10810      | Pedraza et al. 2010 [100]      | tumor(31) vs. ctrl(27)                                                                                                                                                                                                                                                                                                                                                                             |
| GSE12056      | Pellegrini et al. 2008 [101]   | knock_out(10) vs. ctrl(10)                                                                                                                                                                                                                                                                                                                                                                         |
| GSE7462       | Peretz et al. 2007 [102]       | DE_00h(5) vs. FA_00h(4)<br>DE_04h(5) vs. FA_04h(4)<br>DE_22h(3) vs. FA_22h(2)                                                                                                                                                                                                                                                                                                                      |
| GSE22435      | Pihlajamaki et al. 2011 [103]  | IGT_DM2(7) vs. ctrl(10)                                                                                                                                                                                                                                                                                                                                                                            |
| GSE6872       | Platts et al. 2007 [104]       | teratozoo(8) vs. normo(13)                                                                                                                                                                                                                                                                                                                                                                         |
| GSE11348      | Proud et al. 2007 [105]        | ctrl_2d(16) vs. ctrl_pre(16)<br>ctrl_8h(16) vs. ctrl_pre(16)<br>rv16_2d(15) vs. rv16_pre(15)<br>rv16_8h(15) vs. rv16_pre(15)                                                                                                                                                                                                                                                                       |
| GSE11524      | Raghavachari et al. 2007 [106] | sickle(18) vs. ctrl(12)                                                                                                                                                                                                                                                                                                                                                                            |
| GSE7116       | Raje et al. 2008 [107]         | MM(10) vs. healthy(5)<br>ONJ(11) vs. healthy(5)                                                                                                                                                                                                                                                                                                                                                    |
| GSE12773      | Rate et al. 2009 [108]         | AEC_conditioned(5) vs. ctrl(5)                                                                                                                                                                                                                                                                                                                                                                     |
| GSE31177      | Rayner et al. 2011 [109]       | treated_04w(6) vs. ctrl_04w(6)<br>treated_12w(6) vs. ctrl_12w(6)                                                                                                                                                                                                                                                                                                                                   |
| GSE19810      | Riewe et al. 2010 [110]        | pg(4) vs. ctrl(4)                                                                                                                                                                                                                                                                                                                                                                                  |
| GSE31215      | Riggi et al. 2010 [111]        | EWS_FLI(4) vs. empty_vector(4)                                                                                                                                                                                                                                                                                                                                                                     |
| GSE8762       | Runne et al. 2010 [112]        | HD_f(8) vs. ctrl_f(5)<br>HD_m(4) vs. ctrl_m(5)                                                                                                                                                                                                                                                                                                                                                     |
| GSE22842      | Saddic et al. 2010 [113]       | rb(4) vs. ctrl(4)<br>rb_smyd(4) vs. ctrl(4)<br>smyd(4) vs. ctrl(4)                                                                                                                                                                                                                                                                                                                                 |
| GSE26526      | Saiya-Cork et al. 2011 [114]   | del11q(10) vs. n_del11q(9)                                                                                                                                                                                                                                                                                                                                                                         |
| GSE7554       | Samols et al. 2007 [115]       | 293_CV(4) vs. 293_miRNA(4)                                                                                                                                                                                                                                                                                                                                                                         |
| GSE13284      | Sankaran et al. 2008 [116]     | B(6) vs. N(6)                                                                                                                                                                                                                                                                                                                                                                                      |
| GSE5563       | Santegoets et al. 2007 [117]   | VIN_b(9) vs. ctrl_b(10)                                                                                                                                                                                                                                                                                                                                                                            |

| Accession no. | Reference                        | Contrast                                                                                                                                                                                                 |
|---------------|----------------------------------|----------------------------------------------------------------------------------------------------------------------------------------------------------------------------------------------------------|
| GSE32057      | Sen et al. 2011 [118]            | SDS(9) vs. normal(7)                                                                                                                                                                                     |
| GSE7846       | Sha et al. 2007 [119]            | em(5) vs. without_em(5)                                                                                                                                                                                  |
| GSE11959      | Shang et al. 2008 [120]          | 24h_10H5(4) vs. vehicle(4)                                                                                                                                                                               |
| GSE9264       | Skalsky et al. 2007 [121]        | miR_155(4) vs. pcDNA3_1(4)<br>miR_k12(4) vs. pcDNA3_1(4)                                                                                                                                                 |
| GSE6798       | Skov et al. 2007 [122]           | PCOS(16) vs. ctrl(13)                                                                                                                                                                                    |
| GSE3292       | Slebos et al. 2006 [123]         | positive(8) vs. negative(28)                                                                                                                                                                             |
| GSE7890       | Smith et al. 2008 [124]          | keloid.t(5) vs. normal.t(4)<br>keloid.u(5) vs. normal.u(5)                                                                                                                                               |
| GSE11886      | Smith et al. 2008 [125]          | patient_IFN(7) vs. ctrl_IFN(9)<br>patient_none(8) vs. ctrl_none(9)                                                                                                                                       |
| GSE7869       | Song et al. 2009 [126]           | small+medium+large(13) vs. mini(5)                                                                                                                                                                       |
| GSE12368      | Soon et al. 2009 [127]           | ACA(16) vs. normal(6)<br>ACC(12) vs. ACA(16)<br>ACC(12) vs. normal(6)                                                                                                                                    |
| GSE22600      | Spillman et al. 2010 [128]       | 2008.tx(4) vs. 2008.ctrl(4)<br>PEO4.tx(4) vs. PEO4.ctrl(3)                                                                                                                                               |
| GSE12734      | Stamatopoulos et al. 2009 [129]  | high(7) vs. low(7)                                                                                                                                                                                       |
| GSE32924      | Suarez-Farinas et al. 2011 [130] | AL(13) vs. normal(8)<br>ANL(12) vs. normal(8)                                                                                                                                                            |
| GSE4290       | Sun et al. 2006 [131]            | grade_2(45) vs. non-tumor(23)<br>grade_3(31) vs. non-tumor(23)<br>grade_4(81) vs. non-tumor(23)                                                                                                          |
| GSE33316      | Sun et al. 2012 [132]            | castrated(5) vs. ctrl(5)                                                                                                                                                                                 |
| GSE28750      | Sutherland et al. 2011 [133]     | post_s(11) vs. healthy(20)<br>sepsis(10) vs. healthy(20)<br>sepsis(10) vs. post_s(11)                                                                                                                    |
| GSE19982      | Tan et al. 2010 [134]            | C(15) vs. O(15)                                                                                                                                                                                          |
| GSE11199      | Thuong et al. 2008 [135]         | LTB_stim(4) vs. PTB_stim(4)<br>LTB_stim(4) vs. TBM_stim(4)<br>PTB_stim(4) vs. TBM_stim(4)<br>stim(12) vs. unstim(12)                                                                                     |
| GSE31773      | Tsitsiou et al. 2012 [136]       | CD4+_sa(8) vs. CD4+_he(8)<br>CD4+_sa(8) vs. CD4+_nsa(4)<br>CD8+_sa(8) vs. CD8+_he(8)<br>CD8+_sa(8) vs. CD8+_nsa(4)                                                                                       |
| GSE14001      | Tung et al. 2009 [137]           | high(10) vs. surface(3)<br>low(10) vs. high(10)<br>low(10) vs. surface(3)                                                                                                                                |
| GSE5764       | Turashvili et al. 2007 [138]     | tumor_d(5) vs. normal_d(10)<br>tumor_d(5) vs. normal_d+normal_l(20)<br>tumor_d(5) vs. normal_l(10)<br>tumor_l(5) vs. normal_d(10)<br>tumor_l(5) vs. normal_d+normal_l(20)<br>tumor_l(5) vs. normal_l(10) |
| GSE13933      | Turetz et al. 2009 [139]         | sa_non-sm(23) vs. t_non-sm(26)<br>sa_sm(19) vs. t_sm(19)<br>t_sm(19) vs. t_non-sm(26)                                                                                                                    |
| GSE7788       | Van et al. 2010 [140]            | NLPHL(10) vs. THRBL(10)                                                                                                                                                                                  |
| GSE26725      | Vargova et al. 2011 [141]        | B_CLL(12) vs. ctrl(5)                                                                                                                                                                                    |
| GSE4488       | Vierimaa et al. 2006 [142]       | case(9) vs. ctrl(7)                                                                                                                                                                                      |
| GSE7014       | Vihola et al. 2010 [143]         | DM1(10) vs. normal(6)<br>DM2(20) vs. normal(6)                                                                                                                                                           |
| GSE7562       | Vivanco et al. 2007 [144]        | A431_W(2) vs. A431_P(2)<br>HCC827_W(2) vs. HCC827_P(2)<br>SKBR3_W(2) vs. SKBR3_P(2)<br>WT(6) vs. PR(6)                                                                                                   |
| GSE9150       | Vroling et al. 2008 [145]        | allergic_HDM(5) vs. allergic_saline(5)<br>ctrl_HDM(5) vs. ctrl_saline(5)                                                                                                                                 |

| Accession no. | Reference                    | Contrast                                                                                                                                    |
|---------------|------------------------------|---------------------------------------------------------------------------------------------------------------------------------------------|
| GSE24795      | Wilding et al. 2010 [146]    | rer_pos(14) vs. rer_neg(16)                                                                                                                 |
| GSE27659      | Wong et al. 2010 [147]       | braf(5) vs. wt(5)                                                                                                                           |
| GSE5850       | Wood et al. 2007 [148]       | NL(6) vs. P(6)                                                                                                                              |
| GSE4302       | Woodruff et al. 2007 [149]   | asthmatic_b(42) vs. healthy(28)<br>asthmatic_f(19) vs. asthmatic_b(42)<br>asthmatic_p(13) vs. asthmatic_b(42)<br>smoker(16) vs. healthy(28) |
| GSE7807       | Woszczek et al. 2008 [150]   | LTD4(4) vs. ctrl(4)                                                                                                                         |
| GSE27187      | Yan et al. 2011 [151]        | mutant(6) vs. wild_type(4)                                                                                                                  |
| GSE11981      | Yauch et al. 2008 [152]      | HhAntag(4) vs. vehicle(4)                                                                                                                   |
| GSE20504      | Zeisberger et al. 2010 [153] | serum(5) vs. serum_free(5)                                                                                                                  |

## References

- [1] Adam O, Lavall D, Theobald K, Hohl M, Grube M, et al. (2010) Rac1-induced connective tissue growth factor regulates connexin 43 and n-cadherin expression in atrial fibrillation. *Journal of the American College of Cardiology* 55: 469–480.
- [2] Akinci MM, Turner H, Taveras M, Barash A, Wang Z, et al. (2009) Molecular profiling of conjunctival epithelial side-population stem cells: atypical cell surface markers and sources of a slow-cycling phenotype. *Investigative ophthalmology & visual science* 50: 4162–4172.
- [3] Aoyagi K, Minashi K, Igaki H, Tachimori Y, Nishimura T, et al. (2011) Artificially induced epithelial-mesenchymal transition in surgical subjects: its implications in clinical and basic cancer research. *PloS one* 6: e18196.
- [4] Arashiro P, Eisenberg I, Kho AT, Cerqueira AM, Canovas M, et al. (2009) Transcriptional regulation differs in affected facioscapulohumeral muscular dystrophy patients compared to asymptomatic related carriers. *Proceedings of the National Academy of Sciences* 106: 6220–6225.
- [5] Arijis I, Li K, Toedter G, Quintens R, Van Lommel L, et al. (2009) Mucosal gene signatures to predict response to infliximab in patients with ulcerative colitis. *Gut* 58: 1612–1619.
- [6] Bae D, Camilli TC, Chun G, Lal M, Wright K, et al. (2009) Bypass of hexavalent chromium-induced growth arrest by a protein tyrosine phosphatase inhibitor: enhanced survival and mutagenesis. *Mutation Research/Fundamental and Molecular Mechanisms of Mutagenesis* 660: 40–46.
- [7] Baeke F, Korf H, Overbergh L, Verstuyf A, Thorrez L, et al. (2011) The vitamin d analog, tx527, promotes a human cd4+ cd25highcd127low regulatory t cell profile and induces a migratory signature specific for homing to sites of inflammation. *The Journal of Immunology* 186: 132–142.
- [8] Baens M, Ferreiro JF, Tousseyn T, Urbankova H, Michaux L, et al. (2012) t (x; 14)(p11. 4; q32. 33) is recurrent in marginal zone lymphoma and up-regulates gpr34. *haematologica* 97: 184–188.
- [9] Bhat-Nakshatri P, Appaiah H, Ballas C, Pick-Franke P, Goulet R, et al. (2010) Slug/snai2 and tumor necrosis factor generate breast cells with cd44+/cd24-phenotype. *BMC cancer* 10: 411.
- [10] Brennan D, McGee S, Rexhepaj E, O'Connor D, Robson M, et al. (2011) Identification of a myometrial molecular profile for dystocic labor. *BMC pregnancy and childbirth* 11: 74.
- [11] Bresolin S, Zecca M, Flotho C, Trentin L, Zangrando A, et al. (2010) Gene expression-based classification as an independent predictor of clinical outcome in juvenile myelomonocytic leukemia. *Journal of Clinical Oncology* 28: 1919–1927.
- [12] Brouard S, Puig-Pey I, Lozano JJ, Pallier A, Braud C, et al. (2010) Comparative transcriptional and phenotypic peripheral blood analysis of kidney recipients under cyclosporin a or sirolimus monotherapy. *American Journal of Transplantation* 10: 2604–2614.
- [13] Burga LN, Tung NM, Troyan SL, Bostina M, Konstantinopoulos PA, et al. (2009) Altered proliferation and differentiation properties of primary mammary epithelial cells from brca1 mutation carriers. *Cancer research* 69: 1273–1278.
- [14] Burney RO, Talbi S, Hamilton AE, Vo KC, Nyegaard M, et al. (2007) Gene expression analysis of endometrium reveals progesterone resistance and candidate susceptibility genes in women with endometriosis. *Endocrinology* 148: 3814–3826.
- [15] Butchar JP, Cremer TJ, Clay CD, Gavrillin MA, Wewers MD, et al. (2008) Microarray analysis of human monocytes infected with francisella tularensis identifies new targets of host response subversion. *PloS one* 3: e2924.
- [16] Buzzeo MP, Yang J, Casella G, Reddy V (2008) A preliminary gene expression profile of acute graft-versus-host disease. *Cell transplantation* 17: 489–494.

- [17] Carolan BJ, Heguy A, Harvey BG, Leopold PL, Ferris B, et al. (2006) Up-regulation of expression of the ubiquitin carboxyl-terminal hydrolase 11 gene in human airway epithelium of cigarette smokers. *Cancer research* 66: 10729–10740.
- [18] Carolan BJ, Harvey BG, De BP, Vanni H, Crystal RG (2008) Decreased expression of intelectin 1 in the human airway epithelium of smokers compared to nonsmokers. *The Journal of Immunology* 181: 5760–5767.
- [19] Caron G, Le Gallou S, Lamy T, Tarte K, Fest T (2009) Cxcr4 expression functionally discriminates centroblasts versus centrocytes within human germinal center b cells. *The Journal of Immunology* 182: 7595–7602.
- [20] Chen C, Méndez E, Houck J, Fan W, Lohavanichbutr P, et al. (2008) Gene expression profiling identifies genes predictive of oral squamous cell carcinoma. *Cancer Epidemiology Biomarkers & Prevention* 17: 2152–2162.
- [21] Chen L, Eberlein M, Alsaaty S, Martinez-Anton A, Barb J, et al. (2011) Cooperative and redundant signaling of leukotriene b4 and leukotriene d4 in human monocytes. *Allergy* 66: 1304–1311.
- [22] Cho JH, Gelinas R, Wang K, Etheridge A, Piper MG, et al. (2011) Systems biology of interstitial lung diseases: integration of mrna and microrna expression changes. *BMC medical genomics* 4: 8.
- [23] Cizkova M, Cizeron-Clairac G, Vacher S, Susini A, Andrieu C, et al. (2010) Gene expression profiling reveals new aspects of pik3ca mutation in eralpha-positive breast cancer: major implication of the wnt signaling pathway. *PLoS One* 5: e15647.
- [24] Connolly K, Mitter R, Muir M, Jodrell D, Guichard S (2009) Stable xiap knockdown clones of hct116 colon cancer cells are more sensitive to trail, taxanes and irradiation in vitro. *Cancer chemotherapy and pharmacology* 64: 307–316.
- [25] Conti A, Scala S, D'Agostino P, Alimenti E, Morelli D, et al. (2007) Wide gene expression profiling of ischemia-reperfusion injury in human liver transplantation. *Liver transplantation* 13: 99–113.
- [26] Creighton CJ, Li X, Landis M, Dixon JM, Neumeister VM, et al. (2009) Residual breast cancers after conventional therapy display mesenchymal as well as tumor-initiating features. *Proceedings of the National Academy of Sciences* 106: 13820–13825.
- [27] Demmer RT, Behle JH, Wolf DL, Handfield M, Keschull M, et al. (2008) Transcriptomes in healthy and diseased gingival tissues. *Journal of periodontology* 79: 2112–2124.
- [28] Derbali H, Bossé Y, Côté N, Pibarot P, Audet A, et al. (2010) Increased biglycan in aortic valve stenosis leads to the overexpression of phospholipid transfer protein via toll-like receptor 2. *The American journal of pathology* 176: 2638–2645.
- [29] Dodd LE, Sengupta S, Chen IH, den Boon JA, Cheng YJ, et al. (2006) Genes involved in dna repair and nitrosamine metabolism and those located on chromosome 14q32 are dysregulated in nasopharyngeal carcinoma. *Cancer Epidemiology Biomarkers & Prevention* 15: 2216–2225.
- [30] Dusek JA, Otu HH, Wohllueter AL, Bhasin M, Zerbini LF, et al. (2008) Genomic counter-stress changes induced by the relaxation response. *PLoS One* 3: e2576.
- [31] Dutta SK, Mitra PS, Ghosh S, Zang S, Sonneborn D, et al. (2012) Differential gene expression and a functional analysis of pcb-exposed children: Understanding disease and disorder development. *Environment international* 40: 143–154.
- [32] Erickson DR, Schwarze SR, Dixon JK, Clark CJ, Hersh MA (2008) Differentiation associated changes in gene expression profiles of interstitial cystitis and control urothelial cells. *The Journal of urology* 180: 2681–2687.
- [33] Fall N, Barnes M, Thornton S, Luyrink L, Olson J, et al. (2007) Gene expression profiling of peripheral blood from patients with untreated new-onset systemic juvenile idiopathic arthritis reveals molecular heterogeneity that may predict macrophage activation syndrome. *Arthritis & Rheumatism* 56: 3793–3804.
- [34] Founds SA, Conley YP, Lyons-Weiler JF, Jeyabalan A, Allen Hogge W, et al. (2009) Altered global gene expression in first trimester placentas of women destined to develop preeclampsia. *Placenta* 30: 15–24.
- [35] Frank MB, Wang S, Aggarwal A, Knowlton N, Jiang K, et al. (2009) Disease-associated pathophysiologic structures in pediatric rheumatic diseases show characteristics of scale-free networks seen in physiologic systems: implications for pathogenesis and treatment. *BMC medical genomics* 2: 9.
- [36] Fredriksson K, Tjäder I, Keller P, Petrovic N, Ahlman B, et al. (2008) Dysregulation of mitochondrial dynamics and the muscle transcriptome in icu patients suffering from sepsis induced multiple organ failure. *PloS one* 3: e3686.
- [37] Fujisaki H, Kakuda H, Shimasaki N, Imai C, Ma J, et al. (2009) Expansion of highly cytotoxic human natural killer cells for cancer cell therapy. *Cancer research* 69: 4010–4017.
- [38] Furge KA, Chen J, Koeman J, Swiatek P, Dykema K, et al. (2007) Detection of dna copy number changes and oncogenic signaling abnormalities from gene expression data reveals myc activation in high-grade papillary renal cell carcinoma. *Cancer Research* 67: 3171–3176.

- [39] Galamb O, Sipos F, Solymosi N, Spisák S, Krenács T, et al. (2008) Diagnostic mrna expression patterns of inflamed, benign, and malignant colorectal biopsy specimen and their correlation with peripheral blood results. *Cancer Epidemiology Biomarkers & Prevention* 17: 2835–2845.
- [40] Garaud JC, Schickel JN, Blaison G, Knapp AM, Dembele D, et al. (2011) B cell signature during inactive systemic lupus is heterogeneous: toward a biological dissection of lupus. *PLoS One* 6: e23900.
- [41] Ghorbel MT, Cherif M, Jenkins E, Mokhtari A, Kenny D, et al. (2010) Transcriptomic analysis of patients with tetralogy of fallot reveals the effect of chronic hypoxia on myocardial gene expression. *The Journal of thoracic and cardiovascular surgery* 140: 337–345.
- [42] Ghosh S, Tan F, Yu T, Li Y, Adisa O, et al. (2011) Global gene expression profiling of endothelium exposed to heme reveals an organ-specific induction of cytoprotective enzymes in sickle cell disease. *PloS one* 6: e18399.
- [43] Giordano TJ, Kuick R, Else T, Gauger PG, Vinco M, et al. (2009) Molecular classification and prognostication of adrenocortical tumors by transcriptome profiling. *Clinical Cancer Research* 15: 668–676.
- [44] Gratchev A, Kzhyshkowska J, Kannookadan S, Ochsenreiter M, Popova A, et al. (2008) Activation of a  $\text{tgf-}\beta$ -specific multistep gene expression program in mature macrophages requires glucocorticoid-mediated surface expression of  $\text{tgf-}\beta$  receptor ii. *The Journal of Immunology* 180: 6553–6565.
- [45] Gregg JP, Lit L, Baron CA, Hertz-Picciotto I, Walker W, et al. (2008) Gene expression changes in children with autism. *Genomics* 91: 22–29.
- [46] Gümüş ZH, Du B, Kacker A, Boyle JO, Bocker JM, et al. (2008) Effects of tobacco smoke on gene expression and cellular pathways in a cellular model of oral leukoplakia. *Cancer Prevention Research* 1: 100–111.
- [47] Györfy B, Molnar B, Lage H, Szallasi Z, Eklund AC (2009) Evaluation of microarray preprocessing algorithms based on concordance with rt-pcr in clinical samples. *PLoS One* 4: e5645.
- [48] Hadziselimovic F, Hadziselimovic N, Demougin P, Oakeley E (2011) Testicular gene expression in cryptorchid boys at risk of azoospermia. *Sexual Development* 5: 49–59.
- [49] Harewood L, Schütz F, Boyle S, Perry P, Delorenzi M, et al. (2010) The effect of translocation-induced nuclear reorganization on gene expression. *Genome research* 20: 554–564.
- [50] Harris LW, Wayland M, Lan M, Ryan M, Giger T, et al. (2008) The cerebral microvasculature in schizophrenia: a laser capture microdissection study. *PLoS One* 3: e3964.
- [51] Hartman ZC, Wei J, Osada T, Glass O, Lei G, et al. (2010) An adenoviral vaccine encoding full-length inactivated human her2 exhibits potent immunogenicity and enhanced therapeutic efficacy without oncogenicity. *Clinical Cancer Research* 16: 1466–1477.
- [52] Harvey BG, Heguy A, Leopold PL, Carolan BJ, Ferris B, et al. (2007) Modification of gene expression of the small airway epithelium in response to cigarette smoking. *Journal of Molecular Medicine* 85: 39–53.
- [53] Herbert BS, Chanoux RA, Liu Y, Baenziger PH, Goswami CP, et al. (2010) A molecular signature of normal breast epithelial and stromal cells from li-fraumeni syndrome mutation carriers. *Oncotarget* 1: 405.
- [54] Hever A, Roth RB, Hevezi P, Marin ME, Acosta JA, et al. (2007) Human endometriosis is associated with plasma cells and overexpression of b lymphocyte stimulator. *Proceedings of the National Academy of Sciences* 104: 12451–12456.
- [55] Hiraoka N, Yamazaki-Itoh R, Ino Y, Mizuguchi Y, Yamada T, et al. (2011) Cxcl17 and icam2 are associated with a potential anti-tumor immune response in early intraepithelial stages of human pancreatic carcinogenesis. *Gastroenterology* 140: 310–321.
- [56] Hong Y, Ho KS, Eu KW, Cheah PY (2007) A susceptibility gene set for early onset colorectal cancer that integrates diverse signaling pathways: implication for tumorigenesis. *Clinical cancer research* 13: 1107–1114.
- [57] Hsu DS, Acharya CR, Balakumaran BS, Riedel RF, Kim MK, et al. (2009) Characterizing the developmental pathways  $\text{tcf-1}$ ,  $\text{nkx2-8}$ , and  $\text{pax9}$  in lung cancer. *Proceedings of the National Academy of Sciences* 106: 5312–5317.
- [58] Ince TA, Richardson AL, Bell GW, Saitoh M, Godar S, et al. (2007) Transformation of different human breast epithelial cell types leads to distinct tumor phenotypes. *Cancer cell* 12: 160–170.
- [59] Jailwala P, Waukau J, Glisic S, Jana S, Ehlenbach S, et al. (2009) Apoptosis of  $\text{cd4}^+$   $\text{cd25}^{\text{high}}$  t cells in type 1 diabetes may be partially mediated by  $\text{il-2}$  deprivation. *PloS one* 4: e6527.
- [60] Jensen J, Scherer A, Wanke C, Bräutigam M, Bongiovanni S, et al. (2012) Gene expression is differently affected by pimecrolimus and betamethasone in lesional skin of atopic dermatitis. *Allergy* 67: 413–423.



- [61] Jorgensen E, Stinson A, Shan L, Yang J, Gietl D, et al. (2008) Cigarette smoke induces endoplasmic reticulum stress and the unfolded protein response in normal and malignant human lung cells. *BMC cancer* 8: 229.
- [62] Jorissen RN, Lipton L, Gibbs P, Chapman M, Desai J, et al. (2008) Dna copy-number alterations underlie gene expression differences between microsatellite stable and unstable colorectal cancers. *Clinical Cancer Research* 14: 8061–8069.
- [63] Karoly ED, Li Z, Dailey LA, Hyseni X, Huang YCT (2007) Up-regulation of tissue factor in human pulmonary artery endothelial cells after ultrafine particle exposure. *Environmental health perspectives* 115: 535.
- [64] Kazeros A, Harvey BG, Carolan BJ, Vanni H, Krause A, et al. (2008) Overexpression of apoptotic cell removal receptor mertk in alveolar macrophages of cigarette smokers. *American journal of respiratory cell and molecular biology* 39: 747.
- [65] Kempainen A, Kaprio J, Palotie A, Saarela J (2011) Systematic review of genome-wide expression studies in multiple sclerosis. *BMJ open* 1.
- [66] Kennedy-Crispin M, Billick E, Mitsui H, Gulati N, Fujita H, et al. (2011) Human keratinocytes' response to injury upregulates ccl20 and other genes linking innate and adaptive immunity. *Journal of Investigative Dermatology* 132: 105–113.
- [67] Kobayashi S, Stice JP, Kazmin D, Wittmann BM, Kimbrel EA, et al. (2010) Mechanisms of progesterone receptor inhibition of inflammatory responses in cellular models of breast cancer. *Molecular Endocrinology* 24: 2292–2302.
- [68] Kothapalli KS, Anthony JC, Pan BS, Hsieh AT, Nathanielsz PW, et al. (2007) Differential cerebral cortex transcriptomes of baboon neonates consuming moderate and high docosahexaenoic acid formulas. *PLoS One* 2: e370.
- [69] Koziel J, Maciag-Gudowska A, Mikolajczyk T, Bzowska M, Sturdevant DE, et al. (2009) Phagocytosis of staphylococcus aureus by macrophages exerts cytoprotective effects manifested by the upregulation of antiapoptotic factors. *PLoS One* 4: e5210.
- [70] Kretschmer C, Sterner-Kock A, Siedentopf F, Schoenegg W, Schlag PM, et al. (2011) Identification of early molecular markers for breast cancer. *Mol Cancer* 10: 15.
- [71] Kuner R, Muley T, Meister M, Ruschhaupt M, Buness A, et al. (2009) Global gene expression analysis reveals specific patterns of cell junctions in non-small cell lung cancer subtypes. *Lung Cancer* 63: 32–38.
- [72] Le Dieu R, Taussig DC, Ramsay AG, Mitter R, Miraki-Moud F, et al. (2009) Peripheral blood t cells in acute myeloid leukemia (aml) patients at diagnosis have abnormal phenotype and genotype and form defective immune synapses with aml blasts. *Blood* 114: 3909–3916.
- [73] Lee HM, Sugino H, Aoki C, Shimaoka Y, Suzuki R, et al. (2011) Abnormal networks of immune response-related molecules in bone marrow cells from patients with rheumatoid arthritis as revealed by dna microarray analysis. *Arthritis Res Ther* 13: R89.
- [74] Lesnick TG, Papapetropoulos S, Mash DC, Ffrench-Mullen J, Shehadeh L, et al. (2007) A genomic pathway approach to a complex disease: axon guidance and parkinson disease. *PLoS genetics* 3: e98.
- [75] Leung KT, Chan KY, Ng PC, Lau TK, Chiu WM, et al. (2011) The tetraspanin cd9 regulates migration, adhesion, and homing of human cord blood cd34+ hematopoietic stem and progenitor cells. *Blood* 117: 1840–1850.
- [76] Li M, Balch C, Montgomery JS, Jeong M, Chung JH, et al. (2009) Integrated analysis of dna methylation and gene expression reveals specific signaling pathways associated with platinum resistance in ovarian cancer. *BMC medical genomics* 2: 34.
- [77] Liang WS, Dunckley T, Beach TG, Grover A, Mastroeni D, et al. (2007) Gene expression profiles in anatomically and functionally distinct regions of the normal aged human brain. *Physiological genomics* 28: 311–322.
- [78] Liu SB, He YY, Zhang Y, Lee WH, Qian JQ, et al. (2008) A novel non-lens  $\beta\gamma$ -crystallin and trefoil factor complex from amphibian skin and its functional implications. *PLoS One* 3: e1770.
- [79] Liu D, Glaser AP, Patibandla S, Blum A, Munson PJ, et al. (2011) Transcriptional profiling of cd133+ cells in coronary artery disease and effects of exercise on gene expression. *Cytotherapy* 13: 227–236.
- [80] Liu TM, Guo XM, Tan HS, Hui JH, Lim B, et al. (2011) Zinc-finger protein 145, acting as an upstream regulator of sox9, improves the differentiation potential of human mesenchymal stem cells for cartilage regeneration and repair. *Arthritis & Rheumatism* 63: 2711–2720.
- [81] Loudin M, Wang J, Leung HE, Gurusiddappa S, Meyer J, et al. (2011) Genomic profiling in down syndrome acute lymphoblastic leukemia identifies histone gene deletions associated with altered methylation profiles. *Leukemia* 25: 1555–1563.
- [82] Magda D, Lecane P, Wang Z, Hu W, Thiemann P, et al. (2008) Synthesis and anticancer properties of water-soluble zinc ionophores. *Cancer research* 68: 5318–5325.

- [83] Mans JJ, von Lackum K, Dorsey C, Willis S, Wallet SM, et al. (2009) The degree of microbiome complexity influences the epithelial response to infection. *BMC genomics* 10: 380.
- [84] Maouche S, Poirier O, Godefroy T, Olaso R, Gut I, et al. (2008) Performance comparison of two microarray platforms to assess differential gene expression in human monocyte and macrophage cells. *BMC genomics* 9: 302.
- [85] McGowan KA, Pang WW, Bhardwaj R, Perez MG, Pluvinae JV, et al. (2011) Reduced ribosomal protein gene dosage and p53 activation in low-risk myelodysplastic syndrome. *Blood* 118: 3622–3633.
- [86] Meyers JA, Su DW, Lerner A (2009) Chronic lymphocytic leukemia and b and t cells differ in their response to cyclic nucleotide phosphodiesterase inhibitors. *The Journal of Immunology* 182: 5400–5411.
- [87] Miao ZH, Player A, Shankavaram U, Wang YH, Zimonjic DB, et al. (2007) Nonclassic functions of human topoisomerase  $\alpha$ : genome-wide and pharmacologic analyses. *Cancer research* 67: 8752–8761.
- [88] Michaelis KA, Knox AJ, Xu M, Kiseljak-Vassiliades K, Edwards MG, et al. (2011) Identification of growth arrest and dna-damage-inducible gene  $\beta$  (*gadd45 $\beta$* ) as a novel tumor suppressor in pituitary gonadotrope tumors. *Endocrinology* 152: 3603–3613.
- [89] Mikkelsen T, Brodie C, Finniss S, Berens ME, Rennert JL, et al. (2009) Radiation sensitization of glioblastoma by cilengitide has unanticipated schedule-dependency. *International Journal of Cancer* 124: 2719–2727.
- [90] Misu H, Takamura T, Takayama H, Hayashi H, Matsuzawa-Nagata N, et al. (2010) A liver-derived secretory protein, selenoprotein p, causes insulin resistance. *Cell metabolism* 12: 483–495.
- [91] Mosig S, Rennert K, Büttner P, Krause S, Lütjohann D, et al. (2008) Monocytes of patients with familial hypercholesterolemia show alterations in cholesterol metabolism. *BMC Medical Genomics* 1: 60.
- [92] Mowery Y, Weinberg J, Kennedy M, Bond K, Moore J, et al. (2010) Lmp-420: a novel purine nucleoside analog with potent cytotoxic effects for cll cells and minimal toxicity for normal hematopoietic cells. *Leukemia* 24: 1580–1587.
- [93] Naciff JM, Khambatta ZS, Thomason RG, Carr GJ, Tiesman JP, et al. (2009) The genomic response of a human uterine endometrial adenocarcinoma cell line to 17 $\alpha$ -ethynyl estradiol. *Toxicological sciences* 107: 40–55.
- [94] Nagy GR, Györffy B, Galamb O, Molnár B, Nagy B, et al. (2006) Use of routinely collected amniotic fluid for whole-genome expression analysis of polygenic disorders. *Clinical chemistry* 52: 2013–2020.
- [95] Noordhuis MG, Fehrmann RS, Wisman GBA, Nijhuis ER, van Zanden JJ, et al. (2011) Involvement of the *tgf- $\beta$*  and  *$\beta$ -catenin* pathways in pelvic lymph node metastasis in early-stage cervical cancer. *Clinical Cancer Research* 17: 1317–1330.
- [96] Ouillette P, Erba H, Kujawski L, Kaminski M, Shedden K, et al. (2008) Integrated genomic profiling of chronic lymphocytic leukemia identifies subtypes of deletion 13q14. *Cancer research* 68: 1012–1021.
- [97] Pang WW, Price EA, Sahoo D, Beerman I, Maloney WJ, et al. (2011) Human bone marrow hematopoietic stem cells are increased in frequency and myeloid-biased with age. *Proceedings of the National Academy of Sciences* 108: 20012–20017.
- [98] Park WD, Griffin MD, Cornell LD, Cosio FG, Stegall MD (2010) Fibrosis with inflammation at one year predicts transplant functional decline. *Journal of the American Society of Nephrology* 21: 1987–1997.
- [99] Pedersen MB, Skov L, Menné T, Johansen JD, Olsen J (2007) Gene expression time course in the human skin during elicitation of allergic contact dermatitis. *Journal of Investigative Dermatology* 127: 2585–2595.
- [100] Pedraza V, Gomez-Capilla JA, Escaramis G, Gomez C, Torné P, et al. (2010) Gene expression signatures in breast cancer distinguish phenotype characteristics, histologic subtypes, and tumor invasiveness. *Cancer* 116: 486–496.
- [101] Pellegrini M, Cheng JC, Voutila J, Judelson D, Taylor J, et al. (2008) Expression profile of creb knockdown in myeloid leukemia cells. *BMC cancer* 8: 264.
- [102] Peretz A, Peck EC, Bammler TK, Beyer RP, Sullivan JH, et al. (2007) Diesel exhaust inhalation and assessment of peripheral blood mononuclear cell gene transcription effects: an exploratory study of healthy human volunteers. *Inhalation toxicology* 19: 1107–1119.
- [103] Pihlajamäki J, Lerin C, Itkonen P, Boes T, Floss T, et al. (2011) Expression of the splicing factor gene *SFRS10* is reduced in human obesity and contributes to enhanced lipogenesis. *Cell metabolism* 14: 208–218.
- [104] Platts AE, Dix DJ, Chemes HE, Thompson KE, Goodrich R, et al. (2007) Success and failure in human spermatogenesis as revealed by teratozoospermic rnas. *Human molecular genetics* 16: 763–773.
- [105] Proud D, Turner RB, Winther B, Wiehler S, Tiesman JP, et al. (2008) Gene expression profiles during in vivo human rhinovirus infection insights into the host response. *American journal of respiratory and critical care medicine* 178: 962–968.

- [106] Raghavachari N, Xu X, Harris A, Villagra J, Logun C, et al. (2007) Amplified expression profiling of platelet transcriptome reveals changes in arginine metabolic pathways in patients with sickle cell disease. *Circulation* 115: 1551–1562.
- [107] Raje N, Woo SB, Hande K, Yap JT, Richardson PG, et al. (2008) Clinical, radiographic, and biochemical characterization of multiple myeloma patients with osteonecrosis of the jaw. *Clinical Cancer Research* 14: 2387–2395.
- [108] Rate A, Upham JW, Bosco A, McKenna KL, Holt PG (2009) Airway epithelial cells regulate the functional phenotype of locally differentiating dendritic cells: implications for the pathogenesis of infectious and allergic airway disease. *The Journal of Immunology* 182: 72–83.
- [109] Rayner KJ, Esau CC, Hussain FN, McDaniel AL, Marshall SM, et al. (2011) Inhibition of mir-33a/b in non-human primates raises plasma hdl and lowers vldl triglycerides. *Nature* 478: 404–407.
- [110] Riewe S, Mans J, Hirano T, Katz J, Shiverick K, et al. (2010) Human trophoblast responses to porphyromonas gingivalis infection. *Molecular oral microbiology* 25: 252–259.
- [111] Riggi N, Suvà ML, De Vito C, Provero P, Stehle JC, et al. (2010) Ews-flt-1 modulates mirna145 and sox2 expression to initiate mesenchymal stem cell reprogramming toward ewing sarcoma cancer stem cells. *Genes & development* 24: 916–932.
- [112] Runne H, Kuhn A, Wild EJ, Pratyaksha W, Kristiansen M, et al. (2007) Analysis of potential transcriptomic biomarkers for huntington's disease in peripheral blood. *Proceedings of the National Academy of Sciences* 104: 14424–14429.
- [113] Saddic LA, West LE, Aslanian A, Yates JR, Rubin SM, et al. (2010) Methylation of the retinoblastoma tumor suppressor by smyd2. *Journal of Biological Chemistry* 285: 37733–37740.
- [114] Saiya-Cork K, Collins R, Parkin B, Ouillette P, Kuizon E, et al. (2011) A pathobiological role of the insulin receptor in chronic lymphocytic leukemia. *Clinical Cancer Research* 17: 2679–2692.
- [115] Samols MA, Skalsky RL, Maldonado AM, Riva A, Lopez MC, et al. (2007) Identification of cellular genes targeted by kshv-encoded micrnas. *PLoS pathogens* 3: e65.
- [116] Sankaran VG, Menne TF, Xu J, Akie TE, Lettre G, et al. (2008) Human fetal hemoglobin expression is regulated by the developmental stage-specific repressor bcl11a. *Science* 322: 1839–1842.
- [117] Santegoets LA, Seters Mv, Helmerhorst TJ, Heijmans-Antonissen C, Hanifi-Moghaddam P, et al. (2007) Hpv related vin: highly proliferative and diminished responsiveness to extracellular signals. *International journal of cancer* 121: 759–766.
- [118] Sen S, Wang H, Nghiem CL, Zhou K, Yau J, et al. (2011) The ribosome-related protein, sbds, is critical for normal erythropoiesis. *Blood* 118: 6407–6417.
- [119] Sha G, Wu D, Zhang L, Chen X, Lei M, et al. (2007) Differentially expressed genes in human endometrial endothelial cells derived from eutopic endometrium of patients with endometriosis compared with those from patients without endometriosis. *Human reproduction* 22: 3159–3169.
- [120] Shang Y, Mao Y, Batson J, Scales SJ, Phillips G, et al. (2008) Antixenograft tumor activity of a humanized anti-insulin-like growth factor-i receptor monoclonal antibody is associated with decreased akt activation and glucose uptake. *Molecular cancer therapeutics* 7: 2599–2608.
- [121] Skalsky RL, Samols MA, Plaisance KB, Boss IW, Riva A, et al. (2007) Kaposi's sarcoma-associated herpesvirus encodes an ortholog of mir-155. *Journal of virology* 81: 12836–12845.
- [122] Skov V, Glinborg D, Knudsen S, Jensen T, Kruse TA, et al. (2007) Reduced expression of nuclear-encoded genes involved in mitochondrial oxidative metabolism in skeletal muscle of insulin-resistant women with polycystic ovary syndrome. *Diabetes* 56: 2349–2355.
- [123] Slebos RJ, Yi Y, Ely K, Carter J, Evjen A, et al. (2006) Gene expression differences associated with human papillomavirus status in head and neck squamous cell carcinoma. *Clinical cancer research* 12: 701–709.
- [124] Smith JC, Boone BE, Opalenik SR, Williams SM, Russell SB (2007) Gene profiling of keloid fibroblasts shows altered expression in multiple fibrosis-associated pathways. *Journal of Investigative Dermatology* 128: 1298–1310.
- [125] Smith JA, Barnes MD, Hong D, DeLay ML, Inman RD, et al. (2008) Gene expression analysis of macrophages derived from ankylosing spondylitis patients reveals interferon- $\gamma$  dysregulation. *Arthritis & Rheumatism* 58: 1640–1649.
- [126] Song X, Di Giovanni V, He N, Wang K, Ingram A, et al. (2009) Systems biology of autosomal dominant polycystic kidney disease (adpkd): computational identification of gene expression pathways and integrated regulatory networks. *Human molecular genetics* 18: 2328–2343.
- [127] Soon P, Gill A, Benn D, Clarkson A, Robinson B, et al. (2009) Microarray gene expression and immunohistochemistry analyses of adrenocortical tumors identify igf2 and ki-67 as useful in differentiating carcinomas from adenomas. *Endocrine-related cancer* 16: 573–583.

- [128] Spillman MA, Manning NG, Dye WW, Sartorius CA, Post MD, et al. (2010) Tissue-specific pathways for estrogen regulation of ovarian cancer growth and metastasis. *Cancer research* 70: 8927–8936.
- [129] Stamatopoulos B, Haibe-Kains B, Equeter C, Meuleman N, Sorée A, et al. (2009) Gene expression profiling reveals differences in microenvironment interaction between patients with chronic lymphocytic leukemia expressing high versus low zap70 mrna. *haematologica* 94: 790–799.
- [130] Suárez-Fariñas M, Tintle SJ, Shemer A, Chiricozzi A, Nograles K, et al. (2011) Nonlesional atopic dermatitis skin is characterized by broad terminal differentiation defects and variable immune abnormalities. *Journal of Allergy and Clinical Immunology* 127: 954–964.
- [131] Sun L, Hui AM, Su Q, Vortmeyer A, Kotliarov Y, et al. (2006) Neuronal and glioma-derived stem cell factor induces angiogenesis within the brain. *Cancer cell* 9: 287–300.
- [132] Sun Y, Wang BE, Leong KG, Yue P, Li L, et al. (2012) Androgen deprivation causes epithelial–mesenchymal transition in the prostate: implications for androgen-deprivation therapy. *Cancer research* 72: 527–536.
- [133] Sutherland A, Thomas M, Brandon RA, Brandon RB, Lipman J, et al. (2011) Development and validation of a novel molecular biomarker diagnostic test for the early detection of sepsis. *Crit Care* 15: R149.
- [134] Tan MH, Wong C, Tan H, Yang X, Ditlev J, et al. (2010) Genomic expression and single-nucleotide polymorphism profiling discriminates chromophobe renal cell carcinoma and oncocytoma. *BMC cancer* 10: 196.
- [135] Thuong NTT, Dunstan SJ, Chau TTH, Thorsson V, Simmons CP, et al. (2008) Identification of tuberculosis susceptibility genes with human macrophage gene expression profiles. *PLoS pathogens* 4: e1000229.
- [136] Tsitsiou E, Williams AE, Moschos SA, Patel K, Rossios C, et al. (2012) Transcriptome analysis shows activation of circulating cd8<sup>+</sup> t cells in patients with severe asthma. *Journal of Allergy and Clinical Immunology* 129: 95–103.
- [137] Tung CS, Mok SC, Tsang YT, Zu Z, Song H, et al. (2009) Pax2 expression in low malignant potential ovarian tumors and low-grade ovarian serous carcinomas. *Modern Pathology* 22: 1243–1250.
- [138] Turashvili G, Bouchal J, Baumforth K, Wei W, Dziechciarkova M, et al. (2007) Novel markers for differentiation of lobular and ductal invasive breast carcinomas by laser microdissection and microarray analysis. *BMC cancer* 7: 55.
- [139] Turetz ML, OConnor TP, Tilley AE, Strulovici-Barel Y, Salit J, et al. (2009) Trachea epithelium as a canary for cigarette smoking-induced biologic phenotype of the small airway epithelium. *Clinical and translational science* 2: 260–272.
- [140] Van Loo P, Tousseyn T, Vanhentenrijk V, Dierickx D, Malecka A, et al. (2010) T-cell/histiocyte-rich large b-cell lymphoma shows transcriptional features suggestive of a tolerogenic host immune response. *haematologica* 95: 440–448.
- [141] Vargova K, Curik N, Burda P, Basova P, Kulvait V, et al. (2011) Myb transcriptionally regulates the mir-155 host gene in chronic lymphocytic leukemia. *Blood* 117: 3816–3825.
- [142] Vierimaa O, Georgitsi M, Lehtonen R, Vahteristo P, Kokko A, et al. (2006) Pituitary adenoma predisposition caused by germline mutations in the aip gene. *Science* 312: 1228–1230.
- [143] Vihola A, Bachinski LL, Siritto M, Olufemi SE, Hajibashi S, et al. (2010) Differences in aberrant expression and splicing of sarcomeric proteins in the myotonic dystrophies dm1 and dm2. *Acta neuropathologica* 119: 465–479.
- [144] Vivanco I, Palaskas N, Tran C, Finn SP, Getz G, et al. (2007) Identification of the jnk signaling pathway as a functional target of the tumor suppressor pten. *Cancer cell* 11: 555–569.
- [145] Vroling AB, Jonker MJ, Luiten S, Breit TM, Fokkens WJ, et al. (2008) Primary nasal epithelium exposed to house dust mite extract shows activated expression in allergic individuals. *American journal of respiratory cell and molecular biology* 38: 293–299.
- [146] Wilding JL, McGowan S, Liu Y, Bodmer WF (2010) Replication error deficient and proficient colorectal cancer gene expression differences caused by 3' utr polyt sequence deletions. *Proceedings of the National Academy of Sciences* 107: 21058–21063.
- [147] Wong KK, Tsang Y, Deavers MT, Mok SC, Zu Z, et al. (2010) Braf mutation is rare in advanced-stage low-grade ovarian serous carcinomas. *The American journal of pathology* 177: 1611–1617.
- [148] Wood JR, Dumesic DA, Abbott DH, Strauss JF (2007) Molecular abnormalities in oocytes from women with polycystic ovary syndrome revealed by microarray analysis. *Journal of Clinical Endocrinology & Metabolism* 92: 705–713.
- [149] Woodruff PG, Boushey HA, Dolganov GM, Barker CS, Yang YH, et al. (2007) Genome-wide profiling identifies epithelial cell genes associated with asthma and with treatment response to corticosteroids. *Proceedings of the National Academy of Sciences* 104: 15858–15863.

- [150] Woszczek G, Chen LY, Nagineni S, Kern S, Barb J, et al. (2008) Leukotriene d<sub>4</sub> induces gene expression in human monocytes through cysteinyl leukotriene type i receptor. *Journal of Allergy and Clinical Immunology* 121: 215–221.
- [151] Yan XJ, Xu J, Gu ZH, Pan CM, Lu G, et al. (2011) Exome sequencing identifies somatic mutations of dna methyltransferase gene dnmt3a in acute monocytic leukemia. *Nature genetics* 43: 309–315.
- [152] Yauch RL, Gould SE, Scales SJ, Tang T, Tian H, et al. (2008) A paracrine requirement for hedgehog signalling in cancer. *Nature* 455: 406–410.
- [153] Zeisberger SM, Zoller S, Riegel M, Chen S, Krenning G, et al. (2010) Optimization of the culturing conditions of human umbilical cord blood-derived endothelial colony-forming cells under xeno-free conditions applying a transcriptomic approach. *Genes to Cells* 15: 671–687.
