# Supplementary material for: Method Designed to Respect Molecular Heterogeneity Can Profoundly Correct Present Data Interpretations for Genome-Wide Expression Analysis
Source: PubMed Central journal article supplement (PMC4368820; doi:10.1371/journal.pone.0121154), 2015-03-20
Supplement: pone.0121154.s024.pdf [file pone.0121154.s024.pdf]

| Data set id.               | Reference              | Brain region(s) | No. of subjects<br>(PTN:CTL) | Platform         |
|----------------------------|------------------------|-----------------|------------------------------|------------------|
| <i>Schizophrenia</i>       |                        |                 |                              |                  |
| AltarA                     | SMRI                   | FC (BA46)       | 32:34                        | HG-U133A         |
| AltarC                     | SMRI                   | FC (BA46/10)    | 11:11                        | HG-U133A         |
| Bahn                       | SMRI                   | FC (BA46)       | 34:33                        | HG-U133A         |
| Barnes                     | Barnes et al. [1]      | TC (BA22)       | 23:19                        | HG-U133 Plus 2.0 |
| Iwa_BA10                   | Iwamoto et al. [2]     | PFC (BA10)      | 13:15                        | HG-U95Av2        |
| Iwa_BA46                   | Iwamoto et al. [3]     | FC (BA46)       | 35:34                        | HG-U133A         |
| Maycox                     | Maycox et al. [4]      | PFC (BA10)      | 28:23                        | HG-U133 Plus 2.0 |
| McLean                     | Glatt et al. [5]       | PFC (BA9)       | 19:26                        | HG-U133A         |
| <i>Bipolar disorder</i>    |                        |                 |                              |                  |
| AltarA                     | SMRI                   | FC (BA46)       | 31:34                        | HG-U133A         |
| Bahn                       | SMRI                   | FC (BA46)       | 31:33                        | HG-U133A         |
| Cing                       | HBTRC                  | CC              | 15:21                        | HG-U133A         |
| Dobrin                     | SMRI                   | FC (BA46)       | 26:25                        | HG-U133 Plus 2.0 |
| Iwamoto                    | Iwamoto et al. [3]     | FC (BA46)       | 32:34                        | HG-U133A         |
| Ryan_D                     | Ryan et al. [6]        | DPFC (BA46)     | 30:31                        | HG-U133A         |
| Ryan_O                     | Ryan et al. [6]        | OFC             | 10:11                        | HG-U133A         |
| SklarA                     | SMRI                   | FC (BA8/9)      | 11:12                        | HG-U95Av2        |
| SklarB                     | SMRI                   | CB              | 11:10                        | HG-U95Av2        |
| <i>Parkinson's disease</i> |                        |                 |                              |                  |
| Lesnick                    | Lesnick et al. [7]     | SN              | 16:9                         | HG-U133 Plus 2.0 |
| Lewan_D                    | Lewandowski et al. [8] | DMNV            | 6:5                          | HG-U133A 2.0     |
| Lewan_I                    | Lewandowski et al. [8] | ION             | 6:5                          | HG-U133A 2.0     |
| Zhang_B                    | Zhang et al. [9]       | PFC (BA9)       | 14:15                        | HG-U133A         |
| Zhang_P                    | Zhang et al. [9]       | PT              | 15:20                        | HG-U133A         |
| Zhang_S                    | Zhang et al. [9]       | SN              | 11:18                        | HG-U133A         |
| Zheng_1                    | Zheng et al. [10]      | SN              | 10:8                         | HG-U133 Plus 2.0 |
| Zheng_2                    | Zheng et al. [10]      | SN              | 8:9                          | HG-U133A         |

Abbreviations: CB, cerebellum; CC, cingulate cortex; CTL, control; DMNV, dorsal motor nucleus of the vagus; DPFC, dorsolateral prefrontal cortex; FC, frontal cortex; HBTRC, Harvard Brain Tissue Resource Center; OFC, orbital frontal cortex; ION, inferior olivary nucleus; PFC, prefrontal cortex; PT, putamen; PTN, patient; SMRI, Stanley Medical Research Institute; SN, substantia nigra; TC, temporal cortex.

## References

- [1] Barnes MR, Huxley-Jones J, Maycox PR, Lennon M, Thornber A, et al. (2011) Transcription and pathway analysis of the superior temporal cortex and anterior prefrontal cortex in schizophrenia. *Journal of neuroscience research* 89: 1218–1227.
- [2] Iwamoto K, Kakiuchi C, Bundo M, Ikeda K, Kato T (2004) Molecular characterization of bipolar disorder by comparing gene expression profiles of postmortem brains of major mental disorders. *Molecular psychiatry* 9: 406–416.
- [3] Iwamoto K, Bundo M, Kato T (2005) Altered expression of mitochondria-related genes in postmortem brains of patients with bipolar disorder or schizophrenia, as revealed by large-scale dna microarray analysis. *Human molecular genetics* 14: 241–253.
- [4] Maycox P, Kelly F, Taylor A, Bates S, Reid J, et al. (2009) Analysis of gene expression in two large schizophrenia cohorts identifies multiple changes associated with nerve terminal function. *Molecular psychiatry* 14: 1083–1094.
- [5] Glatt SJ, Everall IP, Kremen WS, Corbeil J, Šašik R, et al. (2005) Comparative gene expression analysis of blood and brain provides concurrent validation of selenbp1 up-regulation in schizophrenia. *Proceedings of the National Academy of Sciences of the United States of America* 102: 15533–15538.
- [6] Ryan M, Lockstone H, Huffaker S, Wayland M, Webster M, et al. (2006) Gene expression analysis of bipolar disorder reveals downregulation of the ubiquitin cycle and alterations in synaptic genes. *Molecular psychiatry* 11: 965–978.
- [7] Lesnick TG, Papapetropoulos S, Mash DC, Ffrench-Mullen J, Shehadeh L, et al. (2007) A genomic pathway approach to a complex disease: axon guidance and parkinson disease. *PLoS genetics* 3: e98.
- [8] Lewandowski NM, Ju S, Verbitsky M, Ross B, Geddie ML, et al. (2010) Polyamine pathway contributes to the pathogenesis of parkinson disease. *Proceedings of the National Academy of Sciences* 107: 16970–16975.

- [9] Zhang Y, James M, Middleton FA, Davis RL (2005) Transcriptional analysis of multiple brain regions in parkinson's disease supports the involvement of specific protein processing, energy metabolism, and signaling pathways, and suggests novel disease mechanisms. *American Journal of Medical Genetics Part B: Neuropsychiatric Genetics* 137: 5–16.
- [10] Zheng B, Liao Z, Locascio JJ, Lesniak KA, Roderick SS, et al. (2010) Pgc-1 $\alpha$ , a potential therapeutic target for early intervention in parkinsons disease. *Science translational medicine* 2: 52ra73.
