# Supplementary material for: Method Designed to Respect Molecular Heterogeneity Can Profoundly Correct Present Data Interpretations for Genome-Wide Expression Analysis
Source: PubMed Central journal article supplement (PMC4368820; doi:10.1371/journal.pone.0121154), 2015-03-20
Supplement: pone.0121154.s025.pdf [file pone.0121154.s025.pdf]

| List id.                   | Reference                 | List size       | Data analysis method(s)                     |
|----------------------------|---------------------------|-----------------|---------------------------------------------|
| <i>Schizophrenia</i>       |                           |                 |                                             |
| Arion                      | Arion et al. [1]          | 110 genes       | HM( $p < 0.05$ , $ FC  > 0.263$ )           |
| Barnes                     | Barnes et al. [2]         | 1998 probe sets | DQC, $t$ -test( $p < 0.05$ )                |
| Glatt                      | Glatt et al. [3]          | 177 probe sets  | $t$ -test( $p < 0.05$ )                     |
| Maycox                     | Maycox et al. [4]         | 1846 probe sets | DQC, $t$ -test( $p < 0.05$ )                |
| Mistry                     | Mistry et al. [5]         | 136 probe sets  | MTA, CFC, $t$ -test(FDR $< 0.1$ )           |
| PS                         | Pérez-Santiago et al. [6] | 160 probe sets  | MTA, CFC, $t$ -test(80% CF NFP $< 10$ )     |
| <i>Bipolar disorder</i>    |                           |                 |                                             |
| Nakatani                   | Nakatani et al. [7]       | 108 genes       | HM( $p < 0.05$ , $ FC  > 1.5$ )             |
| Ryan                       | Ryan et al. [8]           | 81 genes        | DQC, ANCOVA( $p < 0.05$ )                   |
| Seifu_A                    | Seifuddin et al. [9]      | 171 genes       | MTA, CFC, HM( $p < 0.05$ , $ FC  > 1.07$ )  |
| Seifu_F                    | Seifuddin et al. [9]      | 141 genes       | MTA, CFC, HM( $p < 0.05$ , $ FC  > 1.07$ )  |
| Seifu_H                    | Seifuddin et al. [9]      | 100 genes       | MTA, CFC, HM( $p < 0.05$ , $ FC  > 1.07$ )  |
| <i>Parkinson's disease</i> |                           |                 |                                             |
| Simunovic                  | Simunovic et al. [10]     | 1044 probe sets | SAM, $t$ -test, ANOVA                       |
| Zhang_B                    | Zhang et al. [11]         | 100 probe sets  | HM( $p < 0.05$ , FC $> 1.58$ or $< -2.09$ ) |
| Zhang_P                    | Zhang et al. [11]         | 100 probe sets  | HM( $p < 0.05$ , FC $> 1.33$ or $< -1.61$ ) |
| Zhang_S                    | Zhang et al. [11]         | 100 probe sets  | HM( $p < 0.05$ , FC $> 1.50$ or $< -1.95$ ) |

Abbreviations: CFC, confounding factor control; CF, confidence; DQC, data quality control; FC, fold-change; MTA, meta-analysis; NFP, number of false positives.

## References

- [1] Arion D, Unger T, Lewis DA, Levitt P, Mirnics K (2007) Molecular evidence for increased expression of genes related to immune and chaperone function in the prefrontal cortex in schizophrenia. *Biological psychiatry* 62: 711–721.
- [2] Barnes MR, Huxley-Jones J, Maycox PR, Lennon M, Thornber A, et al. (2011) Transcription and pathway analysis of the superior temporal cortex and anterior prefrontal cortex in schizophrenia. *Journal of neuroscience research* 89: 1218–1227.
- [3] Glatt SJ, Everall IP, Kremen WS, Corbeil J, Šášík R, et al. (2005) Comparative gene expression analysis of blood and brain provides concurrent validation of selenbp1 up-regulation in schizophrenia. *Proceedings of the National Academy of Sciences of the United States of America* 102: 15533–15538.
- [4] Maycox P, Kelly F, Taylor A, Bates S, Reid J, et al. (2009) Analysis of gene expression in two large schizophrenia cohorts identifies multiple changes associated with nerve terminal function. *Molecular psychiatry* 14: 1083–1094.
- [5] Mistry M, Gillis J, Pavlidis P (2013) Genome-wide expression profiling of schizophrenia using a large combined cohort. *Molecular psychiatry* 18: 215–225.
- [6] Pérez-Santiago J, Diez-Alarcia R, Callado LF, Zhang JX, Chana G, et al. (2012) A combined analysis of microarray gene expression studies of the human prefrontal cortex identifies genes implicated in schizophrenia. *Journal of psychiatric research* .
- [7] Nakatani N, Hattori E, Ohnishi T, Dean B, Iwayama Y, et al. (2006) Genome-wide expression analysis detects eight genes with robust alterations specific to bipolar i disorder: relevance to neuronal network perturbation. *Human molecular genetics* 15: 1949–1962.
- [8] Ryan M, Lockstone H, Huffaker S, Wayland M, Webster M, et al. (2006) Gene expression analysis of bipolar disorder reveals downregulation of the ubiquitin cycle and alterations in synaptic genes. *Molecular psychiatry* 11: 965–978.
- [9] Seifuddin F, Pirooznia M, Judy JT, Goes FS, Potash JB, et al. (2013) Systematic review of genome-wide gene expression studies of bipolar disorder. *BMC psychiatry* 13: 213.
- [10] Simunovic F, Yi M, Wang Y, Macey L, Brown LT, et al. (2009) Gene expression profiling of substantia nigra dopamine neurons: further insights into parkinson's disease pathology. *Brain* 132: 1795–1809.
- [11] Zhang Y, James M, Middleton FA, Davis RL (2005) Transcriptional analysis of multiple brain regions in parkinson's disease supports the involvement of specific protein processing, energy metabolism, and signaling pathways, and suggests novel disease mechanisms. *American Journal of Medical Genetics Part B: Neuropsychiatric Genetics* 137: 5–16.
