# Supplementary material for: Method Designed to Respect Molecular Heterogeneity Can Profoundly Correct Present Data Interpretations for Genome-Wide Expression Analysis
Source: PubMed Central journal article supplement (PMC4368820; doi:10.1371/journal.pone.0121154), 2015-03-20
Supplement: pone.0121154.s026.pdf [file pone.0121154.s026.pdf]

### **Harvard Brain Tissue Resource Center:**

1. [http://national\\_databank.mclean.harvard.edu/brainbank/Browse?action=cases&gid=1010](http://national_databank.mclean.harvard.edu/brainbank/Browse?action=cases&gid=1010)
2. [http://national\\_databank.mclean.harvard.edu/brainbank/Browse?action=cases&gid=1009](http://national_databank.mclean.harvard.edu/brainbank/Browse?action=cases&gid=1009)
3. [http://national\\_databank.mclean.harvard.edu/brainbank/Search?action=searchCases&collection=1001&group=-1&region=-1&diagnosis=-1&ethnicity=-1&gender=-1&causedeath=-1&agedeath=-1&pmi=-1&percentprobesets=-1&RNAratio=-1&3-5ratio\\_gapdh=-1&3-5ratio\\_b-actin=-1&searchCases=Search+Assays](http://national_databank.mclean.harvard.edu/brainbank/Search?action=searchCases&collection=1001&group=-1&region=-1&diagnosis=-1&ethnicity=-1&gender=-1&causedeath=-1&agedeath=-1&pmi=-1&percentprobesets=-1&RNAratio=-1&3-5ratio_gapdh=-1&3-5ratio_b-actin=-1&searchCases=Search+Assays)

### **Stanley Medical Research Institute:**

1. [https://www.stanleygenomics.org/stanley/standard/studyDetail.jsp?study\\_id=1](https://www.stanleygenomics.org/stanley/standard/studyDetail.jsp?study_id=1)
2. [https://www.stanleygenomics.org/stanley/standard/studyDetail.jsp?study\\_id=2](https://www.stanleygenomics.org/stanley/standard/studyDetail.jsp?study_id=2)
3. [https://www.stanleygenomics.org/stanley/standard/studyDetail.jsp?study\\_id=3](https://www.stanleygenomics.org/stanley/standard/studyDetail.jsp?study_id=3)
4. [https://www.stanleygenomics.org/stanley/standard/studyDetail.jsp?study\\_id=5](https://www.stanleygenomics.org/stanley/standard/studyDetail.jsp?study_id=5)
5. [https://www.stanleygenomics.org/stanley/standard/studyDetail.jsp?study\\_id=10](https://www.stanleygenomics.org/stanley/standard/studyDetail.jsp?study_id=10)
6. [https://www.stanleygenomics.org/stanley/standard/studyDetail.jsp?study\\_id=14](https://www.stanleygenomics.org/stanley/standard/studyDetail.jsp?study_id=14)

### **Gene Expression Omnibus:**

1. <http://www.ncbi.nlm.nih.gov/geo/query/acc.cgi?acc=GSE10006>
2. <http://www.ncbi.nlm.nih.gov/geo/query/acc.cgi?acc=GSE10041>
3. <http://www.ncbi.nlm.nih.gov/geo/query/acc.cgi?acc=GSE10063>
4. <http://www.ncbi.nlm.nih.gov/geo/query/acc.cgi?acc=GSE10245>
5. <http://www.ncbi.nlm.nih.gov/geo/query/acc.cgi?acc=GSE10334>
6. <http://www.ncbi.nlm.nih.gov/geo/query/acc.cgi?acc=GSE10479>
7. <http://www.ncbi.nlm.nih.gov/geo/query/acc.cgi?acc=GSE10586>
8. <http://www.ncbi.nlm.nih.gov/geo/query/acc.cgi?acc=GSE10700>
9. <http://www.ncbi.nlm.nih.gov/geo/query/acc.cgi?acc=GSE10715>
10. <http://www.ncbi.nlm.nih.gov/geo/query/acc.cgi?acc=GSE10810>
11. <http://www.ncbi.nlm.nih.gov/geo/query/acc.cgi?acc=GSE10927>
12. <http://www.ncbi.nlm.nih.gov/geo/query/acc.cgi?acc=GSE11083>
13. <http://www.ncbi.nlm.nih.gov/geo/query/acc.cgi?acc=GSE11199>
14. <http://www.ncbi.nlm.nih.gov/geo/query/acc.cgi?acc=GSE11348>
15. <http://www.ncbi.nlm.nih.gov/geo/query/acc.cgi?acc=GSE11430>
16. <http://www.ncbi.nlm.nih.gov/geo/query/acc.cgi?acc=GSE11524>
17. <http://www.ncbi.nlm.nih.gov/geo/query/acc.cgi?acc=GSE11618>
18. <http://www.ncbi.nlm.nih.gov/geo/query/acc.cgi?acc=GSE11839>
19. <http://www.ncbi.nlm.nih.gov/geo/query/acc.cgi?acc=GSE11869>

20. <http://www.ncbi.nlm.nih.gov/geo/query/acc.cgi?acc=GSE11886>
21. <http://www.ncbi.nlm.nih.gov/geo/query/acc.cgi?acc=GSE11959>
22. <http://www.ncbi.nlm.nih.gov/geo/query/acc.cgi?acc=GSE11981>
23. <http://www.ncbi.nlm.nih.gov/geo/query/acc.cgi?acc=GSE12056>
24. <http://www.ncbi.nlm.nih.gov/geo/query/acc.cgi?acc=GSE12108>
25. <http://www.ncbi.nlm.nih.gov/geo/query/acc.cgi?acc=GSE12121>
26. <http://www.ncbi.nlm.nih.gov/geo/query/acc.cgi?acc=GSE12198>
27. <http://www.ncbi.nlm.nih.gov/geo/query/acc.cgi?acc=GSE12205>
28. <http://www.ncbi.nlm.nih.gov/geo/query/acc.cgi?acc=GSE12251>
29. <http://www.ncbi.nlm.nih.gov/geo/query/acc.cgi?acc=GSE12368>
30. <http://www.ncbi.nlm.nih.gov/geo/query/acc.cgi?acc=GSE12452>
31. <http://www.ncbi.nlm.nih.gov/geo/query/acc.cgi?acc=GSE12631>
32. <http://www.ncbi.nlm.nih.gov/geo/query/acc.cgi?acc=GSE12644>
33. <http://www.ncbi.nlm.nih.gov/geo/query/acc.cgi?acc=GSE12679>
34. <http://www.ncbi.nlm.nih.gov/geo/query/acc.cgi?acc=GSE12734>
35. <http://www.ncbi.nlm.nih.gov/geo/query/acc.cgi?acc=GSE12767>
36. <http://www.ncbi.nlm.nih.gov/geo/query/acc.cgi?acc=GSE12773>
37. <http://www.ncbi.nlm.nih.gov/geo/query/acc.cgi?acc=GSE12949>
38. <http://www.ncbi.nlm.nih.gov/geo/query/acc.cgi?acc=GSE13067>
39. <http://www.ncbi.nlm.nih.gov/geo/query/acc.cgi?acc=GSE13122>
40. <http://www.ncbi.nlm.nih.gov/geo/query/acc.cgi?acc=GSE13205>
41. <http://www.ncbi.nlm.nih.gov/geo/query/acc.cgi?acc=GSE13274>
42. <http://www.ncbi.nlm.nih.gov/geo/query/acc.cgi?acc=GSE13284>
43. <http://www.ncbi.nlm.nih.gov/geo/query/acc.cgi?acc=GSE13294>
44. <http://www.ncbi.nlm.nih.gov/geo/query/acc.cgi?acc=GSE13670>
45. <http://www.ncbi.nlm.nih.gov/geo/query/acc.cgi?acc=GSE13671>
46. <http://www.ncbi.nlm.nih.gov/geo/query/acc.cgi?acc=GSE13933>
47. <http://www.ncbi.nlm.nih.gov/geo/query/acc.cgi?acc=GSE13987>
48. <http://www.ncbi.nlm.nih.gov/geo/query/acc.cgi?acc=GSE14001>
49. <http://www.ncbi.nlm.nih.gov/geo/query/acc.cgi?acc=GSE14580>
50. <http://www.ncbi.nlm.nih.gov/geo/query/acc.cgi?acc=GSE14858>
51. <http://www.ncbi.nlm.nih.gov/geo/query/acc.cgi?acc=GSE14924>
52. <http://www.ncbi.nlm.nih.gov/geo/query/acc.cgi?acc=GSE14951>
53. <http://www.ncbi.nlm.nih.gov/geo/query/acc.cgi?acc=GSE14970>
54. <http://www.ncbi.nlm.nih.gov/geo/query/acc.cgi?acc=GSE14975>
55. <http://www.ncbi.nlm.nih.gov/geo/query/acc.cgi?acc=GSE15090>
56. <http://www.ncbi.nlm.nih.gov/geo/query/acc.cgi?acc=GSE15192>
57. <http://www.ncbi.nlm.nih.gov/geo/query/acc.cgi?acc=GSE15271>

58. <http://www.ncbi.nlm.nih.gov/geo/query/acc.cgi?acc=GSE15372>
59. <http://www.ncbi.nlm.nih.gov/geo/query/acc.cgi?acc=GSE18608>
60. <http://www.ncbi.nlm.nih.gov/geo/query/acc.cgi?acc=GSE19650>
61. <http://www.ncbi.nlm.nih.gov/geo/query/acc.cgi?acc=GSE19810>
62. <http://www.ncbi.nlm.nih.gov/geo/query/acc.cgi?acc=GSE19982>
63. <http://www.ncbi.nlm.nih.gov/geo/query/acc.cgi?acc=GSE20211>
64. <http://www.ncbi.nlm.nih.gov/geo/query/acc.cgi?acc=GSE20504>
65. <http://www.ncbi.nlm.nih.gov/geo/query/acc.cgi?acc=GSE20891>
66. <http://www.ncbi.nlm.nih.gov/geo/query/acc.cgi?acc=GSE20910>
67. <http://www.ncbi.nlm.nih.gov/geo/query/acc.cgi?acc=GSE21369>
68. <http://www.ncbi.nlm.nih.gov/geo/query/acc.cgi?acc=GSE21422>
69. <http://www.ncbi.nlm.nih.gov/geo/query/acc.cgi?acc=GSE21942>
70. <http://www.ncbi.nlm.nih.gov/geo/query/acc.cgi?acc=GSE22035>
71. <http://www.ncbi.nlm.nih.gov/geo/query/acc.cgi?acc=GSE22224>
72. <http://www.ncbi.nlm.nih.gov/geo/query/acc.cgi?acc=GSE22435>
73. <http://www.ncbi.nlm.nih.gov/geo/query/acc.cgi?acc=GSE22459>
74. <http://www.ncbi.nlm.nih.gov/geo/query/acc.cgi?acc=GSE22600>
75. <http://www.ncbi.nlm.nih.gov/geo/query/acc.cgi?acc=GSE22842>
76. <http://www.ncbi.nlm.nih.gov/geo/query/acc.cgi?acc=GSE22868>
77. <http://www.ncbi.nlm.nih.gov/geo/query/acc.cgi?acc=GSE23343>
78. <http://www.ncbi.nlm.nih.gov/geo/query/acc.cgi?acc=GSE23984>
79. <http://www.ncbi.nlm.nih.gov/geo/query/acc.cgi?acc=GSE23994>
80. <http://www.ncbi.nlm.nih.gov/geo/query/acc.cgi?acc=GSE24468>
81. <http://www.ncbi.nlm.nih.gov/geo/query/acc.cgi?acc=GSE24795>
82. <http://www.ncbi.nlm.nih.gov/geo/query/acc.cgi?acc=GSE24869>
83. <http://www.ncbi.nlm.nih.gov/geo/query/acc.cgi?acc=GSE25014>
84. <http://www.ncbi.nlm.nih.gov/geo/query/acc.cgi?acc=GSE25518>
85. <http://www.ncbi.nlm.nih.gov/geo/query/acc.cgi?acc=GSE25550>
86. <http://www.ncbi.nlm.nih.gov/geo/query/acc.cgi?acc=GSE26272>
87. <http://www.ncbi.nlm.nih.gov/geo/query/acc.cgi?acc=GSE26511>
88. <http://www.ncbi.nlm.nih.gov/geo/query/acc.cgi?acc=GSE26526>
89. <http://www.ncbi.nlm.nih.gov/geo/query/acc.cgi?acc=GSE26725>
90. <http://www.ncbi.nlm.nih.gov/geo/query/acc.cgi?acc=GSE26966>
91. <http://www.ncbi.nlm.nih.gov/geo/query/acc.cgi?acc=GSE27187>
92. <http://www.ncbi.nlm.nih.gov/geo/query/acc.cgi?acc=GSE27390>
93. <http://www.ncbi.nlm.nih.gov/geo/query/acc.cgi?acc=GSE27659>
94. <http://www.ncbi.nlm.nih.gov/geo/query/acc.cgi?acc=GSE28750>
95. <http://www.ncbi.nlm.nih.gov/geo/query/acc.cgi?acc=GSE30153>

96. <http://www.ncbi.nlm.nih.gov/geo/query/acc.cgi?acc=GSE30201>
97. <http://www.ncbi.nlm.nih.gov/geo/query/acc.cgi?acc=GSE30355>
98. <http://www.ncbi.nlm.nih.gov/geo/query/acc.cgi?acc=GSE30784>
99. <http://www.ncbi.nlm.nih.gov/geo/query/acc.cgi?acc=GSE31177>
100. <http://www.ncbi.nlm.nih.gov/geo/query/acc.cgi?acc=GSE31215>
101. <http://www.ncbi.nlm.nih.gov/geo/query/acc.cgi?acc=GSE31773>
102. <http://www.ncbi.nlm.nih.gov/geo/query/acc.cgi?acc=GSE32057>
103. <http://www.ncbi.nlm.nih.gov/geo/query/acc.cgi?acc=GSE32178>
104. <http://www.ncbi.nlm.nih.gov/geo/query/acc.cgi?acc=GSE32473>
105. <http://www.ncbi.nlm.nih.gov/geo/query/acc.cgi?acc=GSE32701>
106. <http://www.ncbi.nlm.nih.gov/geo/query/acc.cgi?acc=GSE32719>
107. <http://www.ncbi.nlm.nih.gov/geo/query/acc.cgi?acc=GSE3292>
108. <http://www.ncbi.nlm.nih.gov/geo/query/acc.cgi?acc=GSE32924>
109. <http://www.ncbi.nlm.nih.gov/geo/query/acc.cgi?acc=GSE33316>
110. <http://www.ncbi.nlm.nih.gov/geo/query/acc.cgi?acc=GSE4107>
111. <http://www.ncbi.nlm.nih.gov/geo/query/acc.cgi?acc=GSE4182>
112. <http://www.ncbi.nlm.nih.gov/geo/query/acc.cgi?acc=GSE4183>
113. <http://www.ncbi.nlm.nih.gov/geo/query/acc.cgi?acc=GSE4290>
114. <http://www.ncbi.nlm.nih.gov/geo/query/acc.cgi?acc=GSE4302>
115. <http://www.ncbi.nlm.nih.gov/geo/query/acc.cgi?acc=GSE4488>
116. <http://www.ncbi.nlm.nih.gov/geo/query/acc.cgi?acc=GSE4498>
117. <http://www.ncbi.nlm.nih.gov/geo/query/acc.cgi?acc=GSE4567>
118. <http://www.ncbi.nlm.nih.gov/geo/query/acc.cgi?acc=GSE5058>
119. <http://www.ncbi.nlm.nih.gov/geo/query/acc.cgi?acc=GSE5281>
120. <http://www.ncbi.nlm.nih.gov/geo/query/acc.cgi?acc=GSE5563>
121. <http://www.ncbi.nlm.nih.gov/geo/query/acc.cgi?acc=GSE5764>
122. <http://www.ncbi.nlm.nih.gov/geo/query/acc.cgi?acc=GSE5850>
123. <http://www.ncbi.nlm.nih.gov/geo/query/acc.cgi?acc=GSE6054>
124. <http://www.ncbi.nlm.nih.gov/geo/query/acc.cgi?acc=GSE6281>
125. <http://www.ncbi.nlm.nih.gov/geo/query/acc.cgi?acc=GSE6364>
126. <http://www.ncbi.nlm.nih.gov/geo/query/acc.cgi?acc=GSE6519>
127. <http://www.ncbi.nlm.nih.gov/geo/query/acc.cgi?acc=GSE6575>
128. <http://www.ncbi.nlm.nih.gov/geo/query/acc.cgi?acc=GSE6798>
129. <http://www.ncbi.nlm.nih.gov/geo/query/acc.cgi?acc=GSE6872>
130. <http://www.ncbi.nlm.nih.gov/geo/query/acc.cgi?acc=GSE6885>
131. <http://www.ncbi.nlm.nih.gov/geo/query/acc.cgi?acc=GSE6962>
132. <http://www.ncbi.nlm.nih.gov/geo/query/acc.cgi?acc=GSE7014>
133. <http://www.ncbi.nlm.nih.gov/geo/query/acc.cgi?acc=GSE7023>

134. <http://www.ncbi.nlm.nih.gov/geo/query/acc.cgi?acc=GSE7116>
135. <http://www.ncbi.nlm.nih.gov/geo/query/acc.cgi?acc=GSE7161>
136. <http://www.ncbi.nlm.nih.gov/geo/query/acc.cgi?acc=GSE7305>
137. <http://www.ncbi.nlm.nih.gov/geo/query/acc.cgi?acc=GSE7462>
138. <http://www.ncbi.nlm.nih.gov/geo/query/acc.cgi?acc=GSE7510>
139. <http://www.ncbi.nlm.nih.gov/geo/query/acc.cgi?acc=GSE7513>
140. <http://www.ncbi.nlm.nih.gov/geo/query/acc.cgi?acc=GSE7515>
141. <http://www.ncbi.nlm.nih.gov/geo/query/acc.cgi?acc=GSE7554>
142. <http://www.ncbi.nlm.nih.gov/geo/query/acc.cgi?acc=GSE7562>
143. <http://www.ncbi.nlm.nih.gov/geo/query/acc.cgi?acc=GSE7568>
144. <http://www.ncbi.nlm.nih.gov/geo/query/acc.cgi?acc=GSE7621>
145. <http://www.ncbi.nlm.nih.gov/geo/query/acc.cgi?acc=GSE7753>
146. <http://www.ncbi.nlm.nih.gov/geo/query/acc.cgi?acc=GSE7788>
147. <http://www.ncbi.nlm.nih.gov/geo/query/acc.cgi?acc=GSE7807>
148. <http://www.ncbi.nlm.nih.gov/geo/query/acc.cgi?acc=GSE7846>
149. <http://www.ncbi.nlm.nih.gov/geo/query/acc.cgi?acc=GSE7869>
150. <http://www.ncbi.nlm.nih.gov/geo/query/acc.cgi?acc=GSE7890>
151. <http://www.ncbi.nlm.nih.gov/geo/query/acc.cgi?acc=GSE8762>
152. <http://www.ncbi.nlm.nih.gov/geo/query/acc.cgi?acc=GSE8823>
153. <http://www.ncbi.nlm.nih.gov/geo/query/acc.cgi?acc=GSE9150>
154. <http://www.ncbi.nlm.nih.gov/geo/query/acc.cgi?acc=GSE9212>
155. <http://www.ncbi.nlm.nih.gov/geo/query/acc.cgi?acc=GSE9250>
156. <http://www.ncbi.nlm.nih.gov/geo/query/acc.cgi?acc=GSE9264>
157. <http://www.ncbi.nlm.nih.gov/geo/query/acc.cgi?acc=GSE21935>
158. <http://www.ncbi.nlm.nih.gov/geo/query/acc.cgi?acc=GSE17612>
159. <http://www.ncbi.nlm.nih.gov/geo/query/acc.cgi?acc=GSE12649>
160. <http://www.ncbi.nlm.nih.gov/geo/query/acc.cgi?acc=GSE12654>
161. <http://www.ncbi.nlm.nih.gov/geo/query/acc.cgi?acc=GSE5388>
162. <http://www.ncbi.nlm.nih.gov/geo/query/acc.cgi?acc=GSE5389>
163. <http://www.ncbi.nlm.nih.gov/geo/query/acc.cgi?acc=GSE19587>
164. <http://www.ncbi.nlm.nih.gov/geo/query/acc.cgi?acc=GSE20168>
165. <http://www.ncbi.nlm.nih.gov/geo/query/acc.cgi?acc=GSE20291>
166. <http://www.ncbi.nlm.nih.gov/geo/query/acc.cgi?acc=GSE20292>
167. <http://www.ncbi.nlm.nih.gov/geo/query/acc.cgi?acc=GSE20141>
168. <http://www.ncbi.nlm.nih.gov/geo/query/acc.cgi?acc=GSE20163>
